# Supplementary material
Source: PubMed Central journal article supplement (PMC5678000)

**A**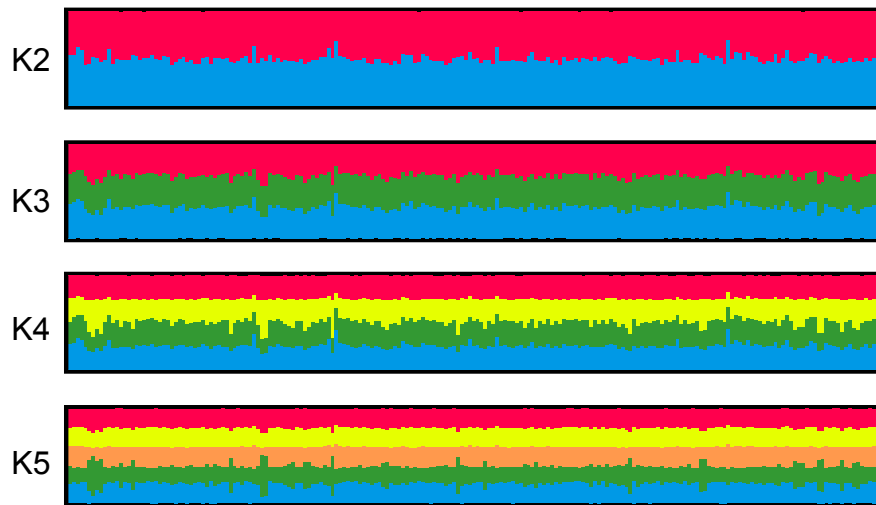**B**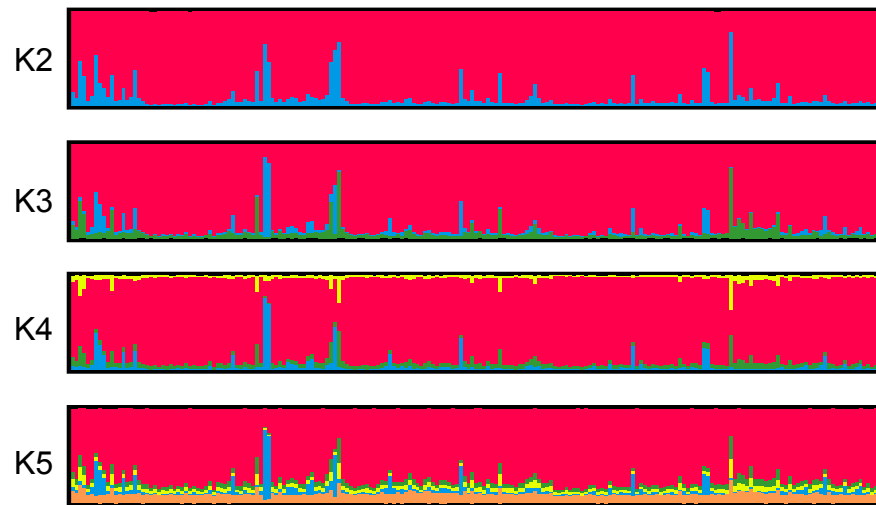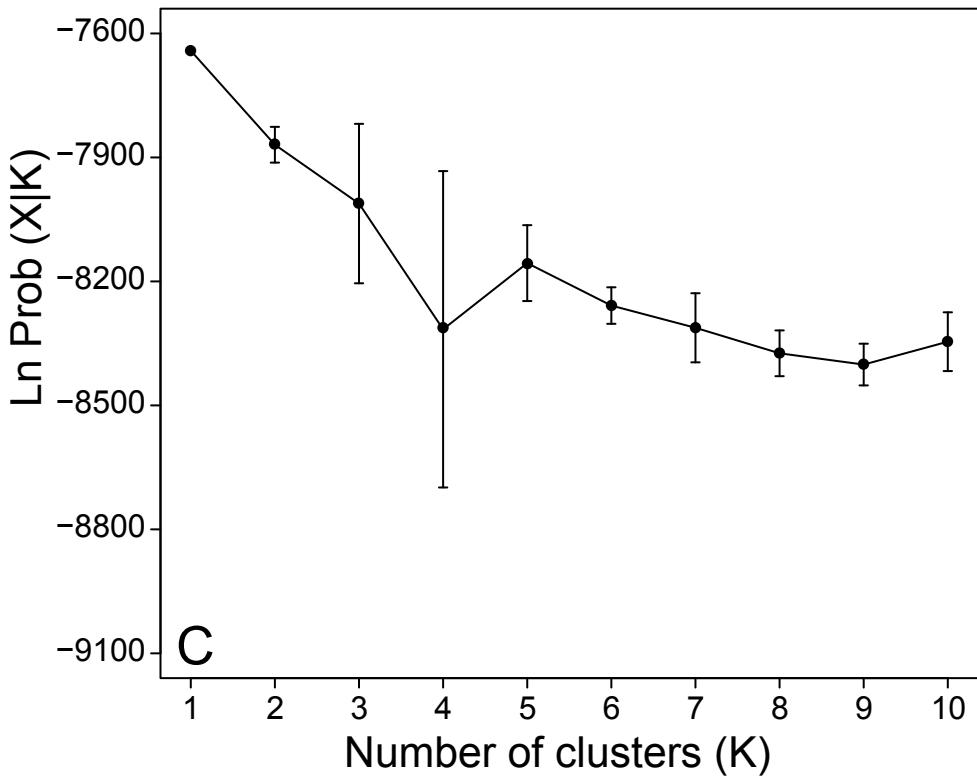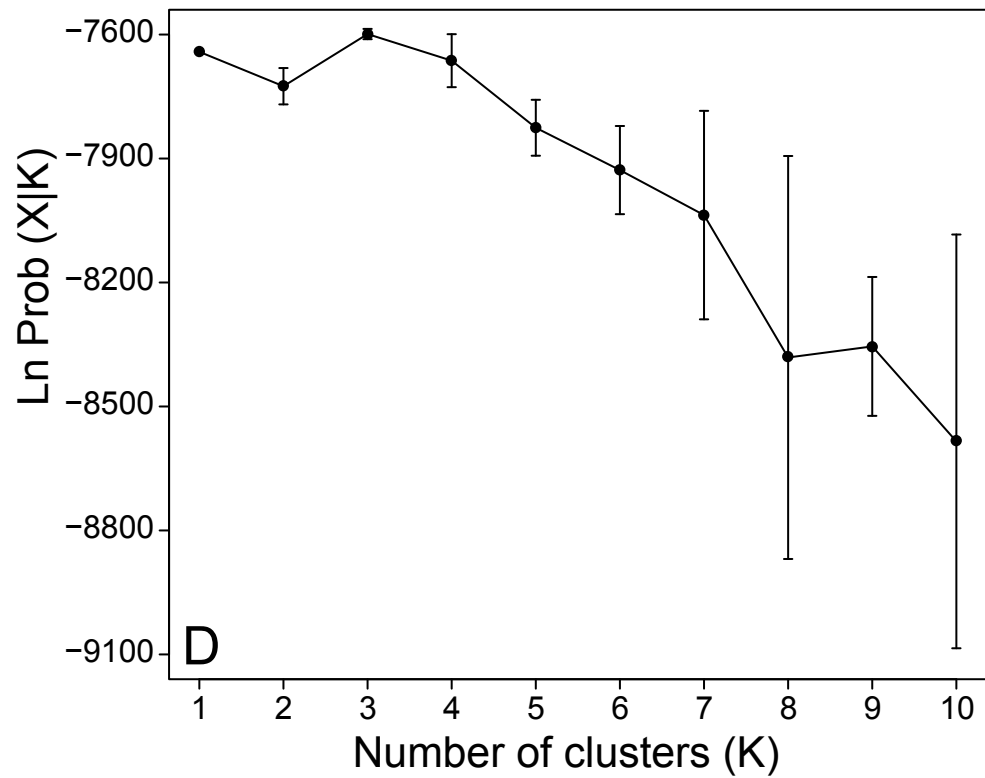

Supplement: hdy201758x5.pdf [file hdy201758x5.pdf]

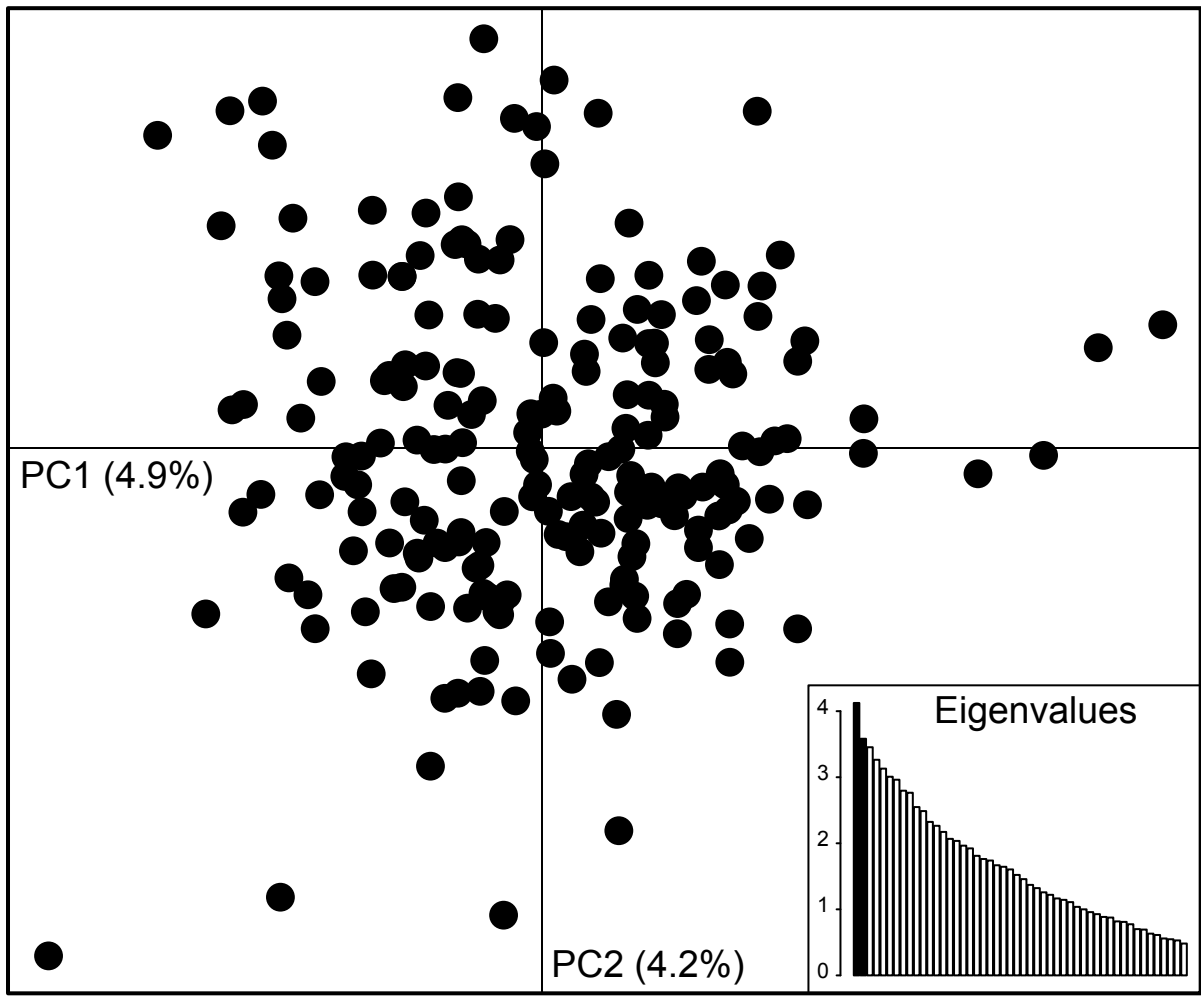

Supplement: hdy201758x6.pdf [file hdy201758x6.pdf]

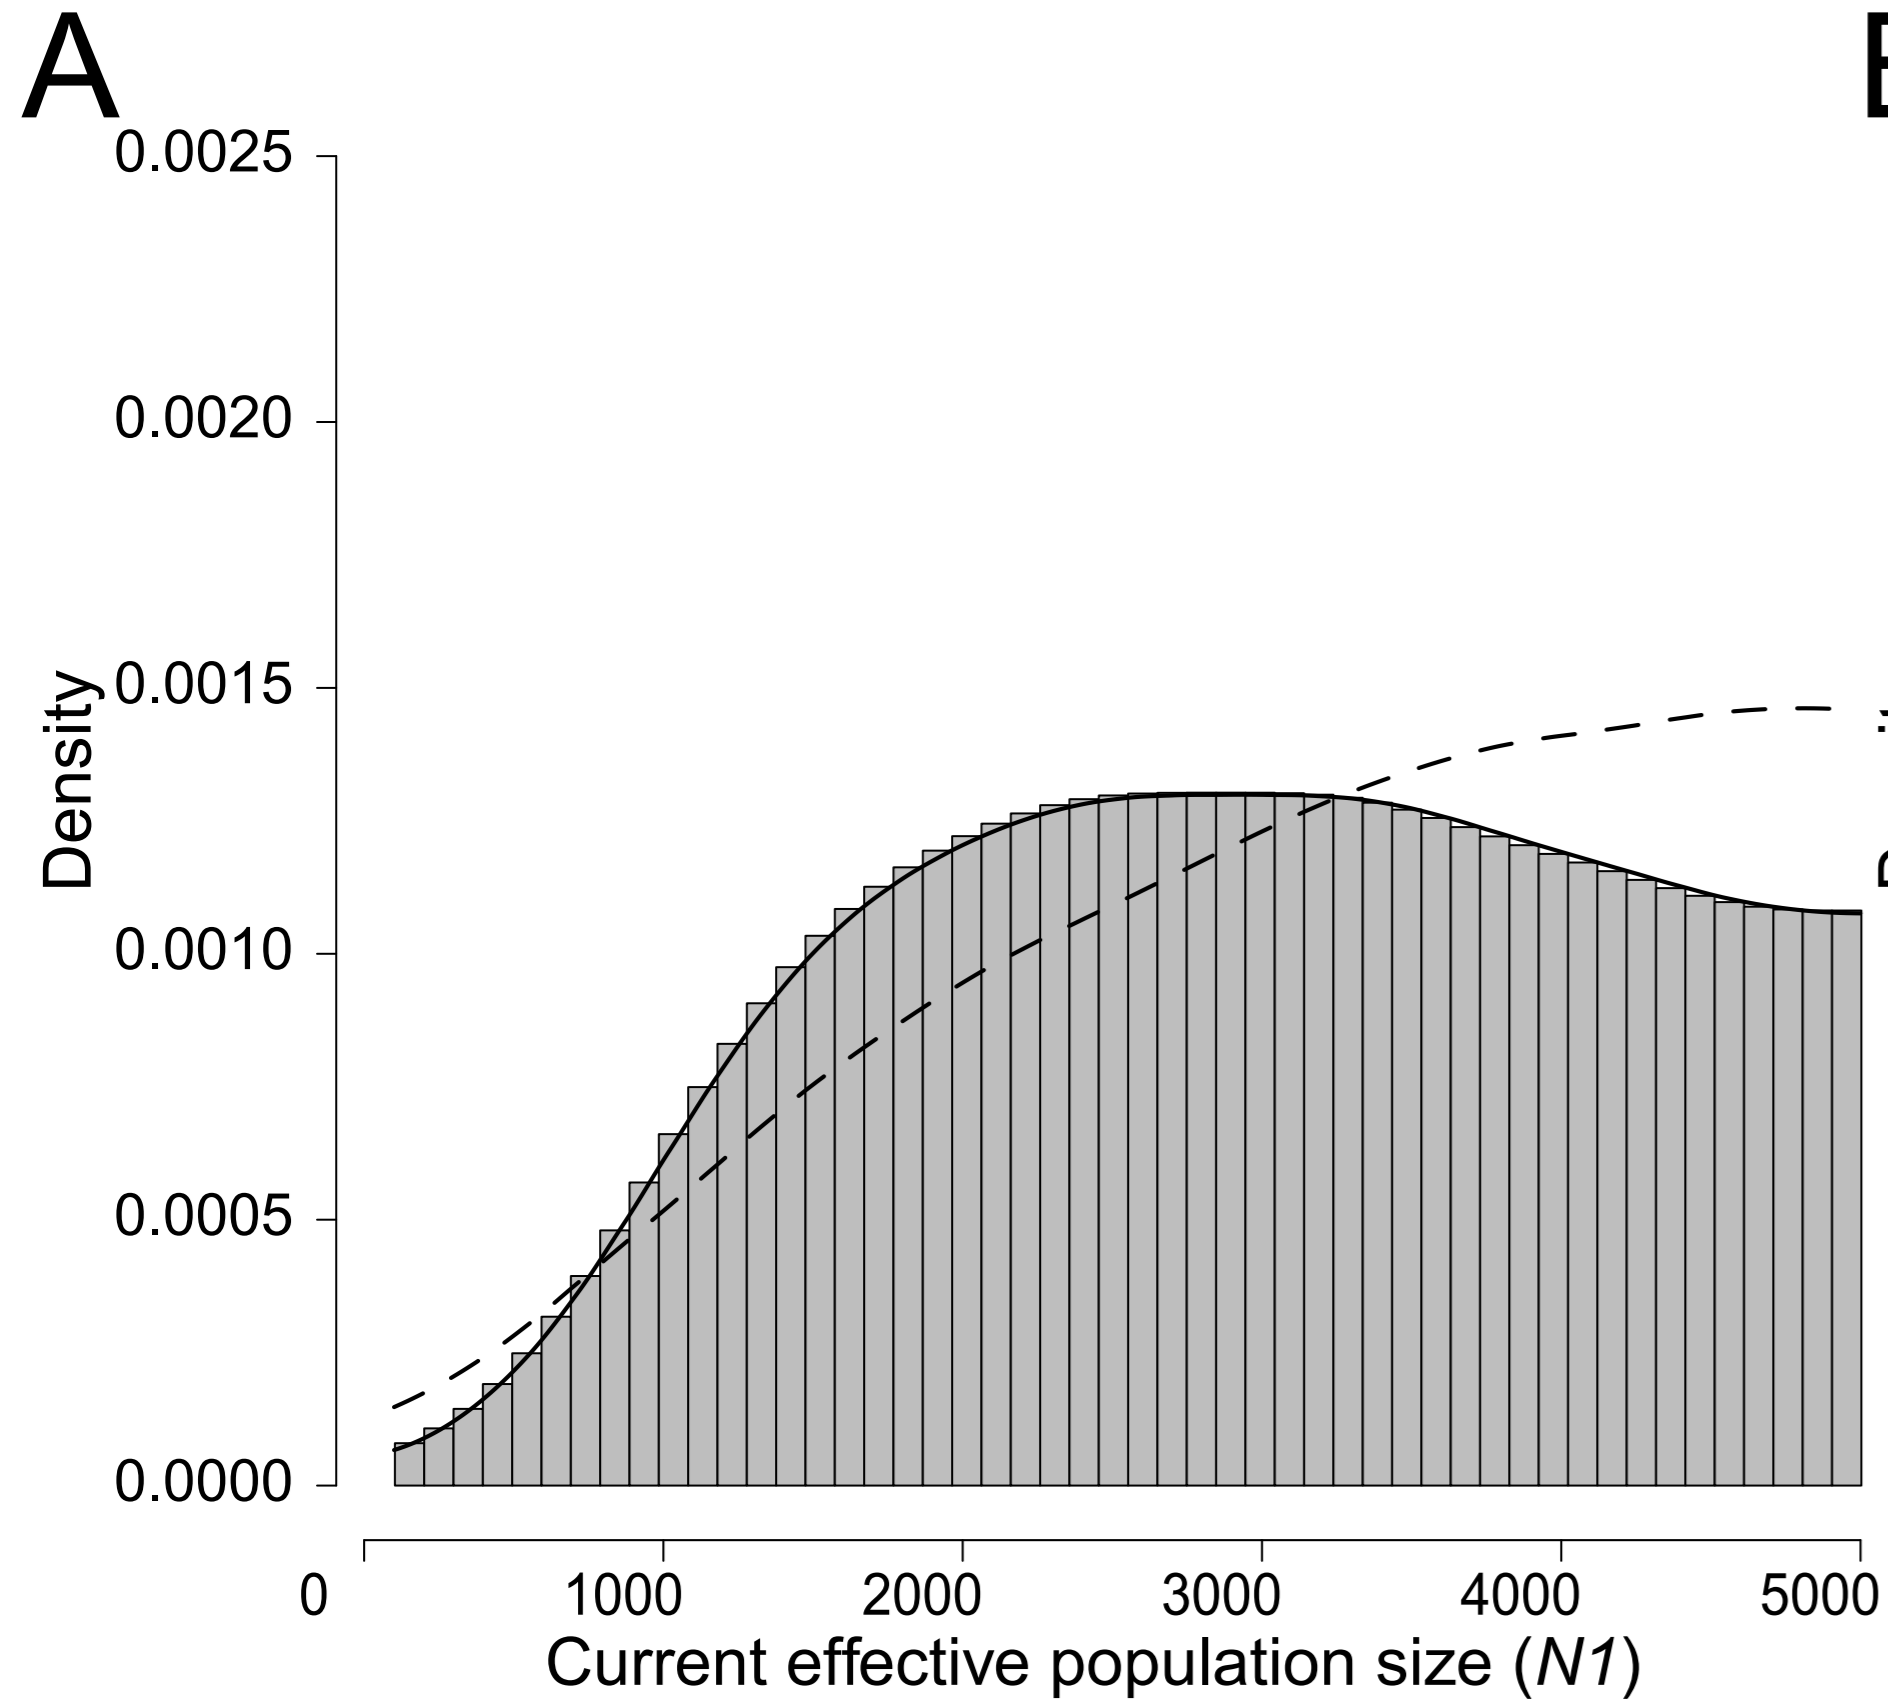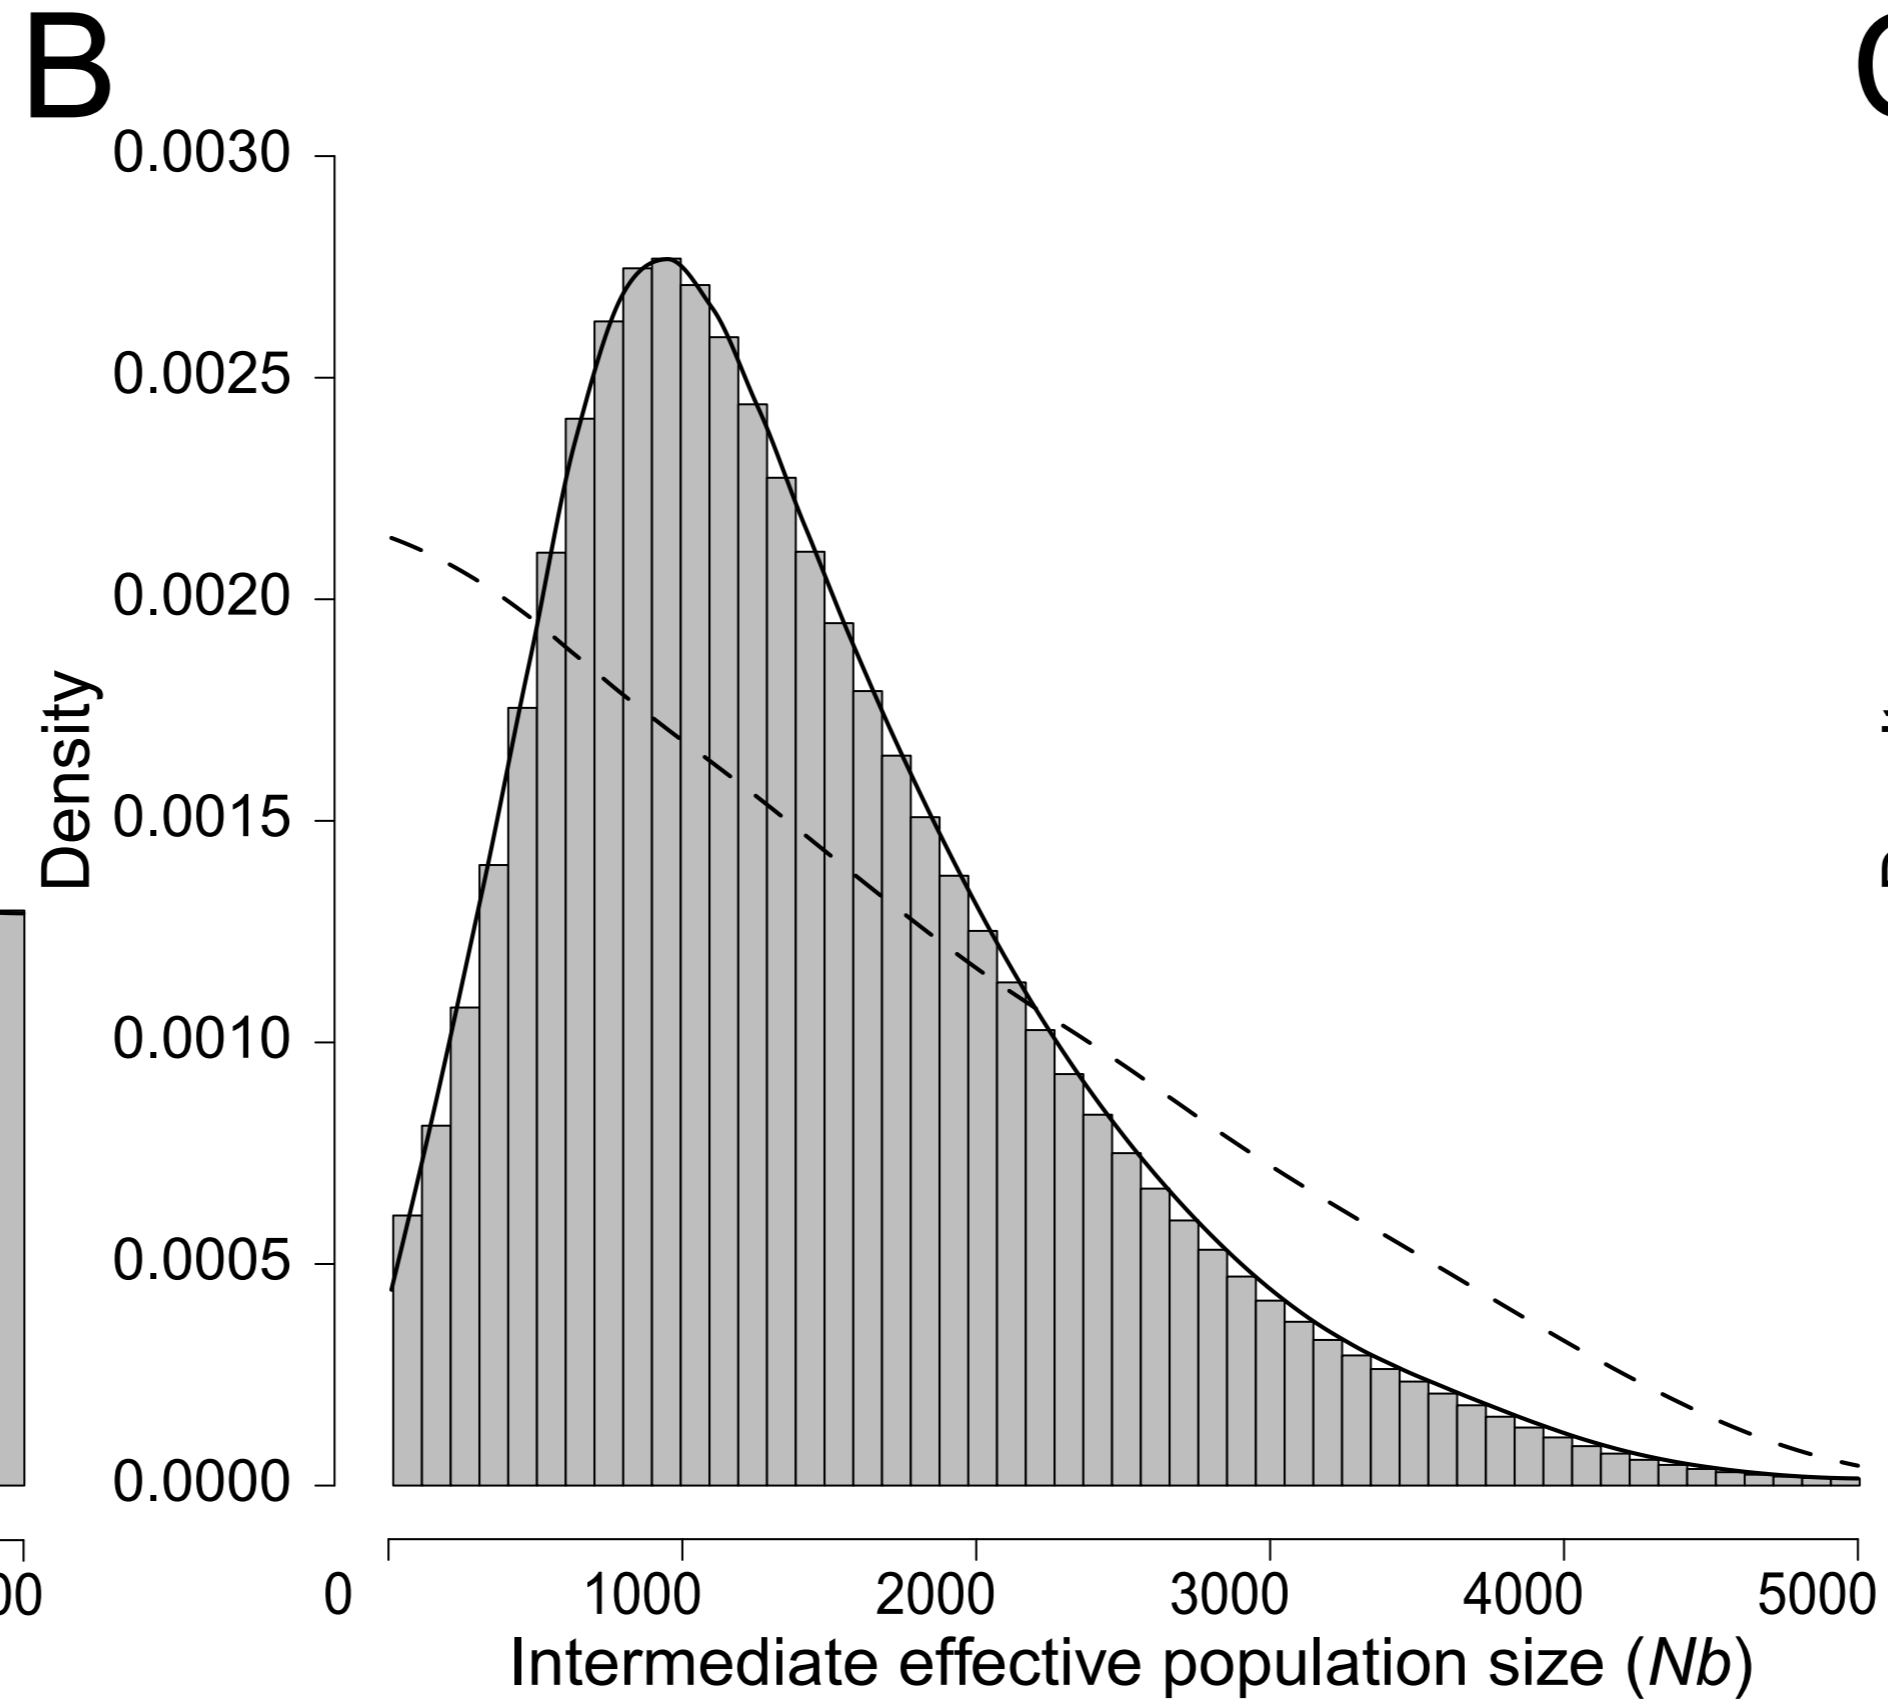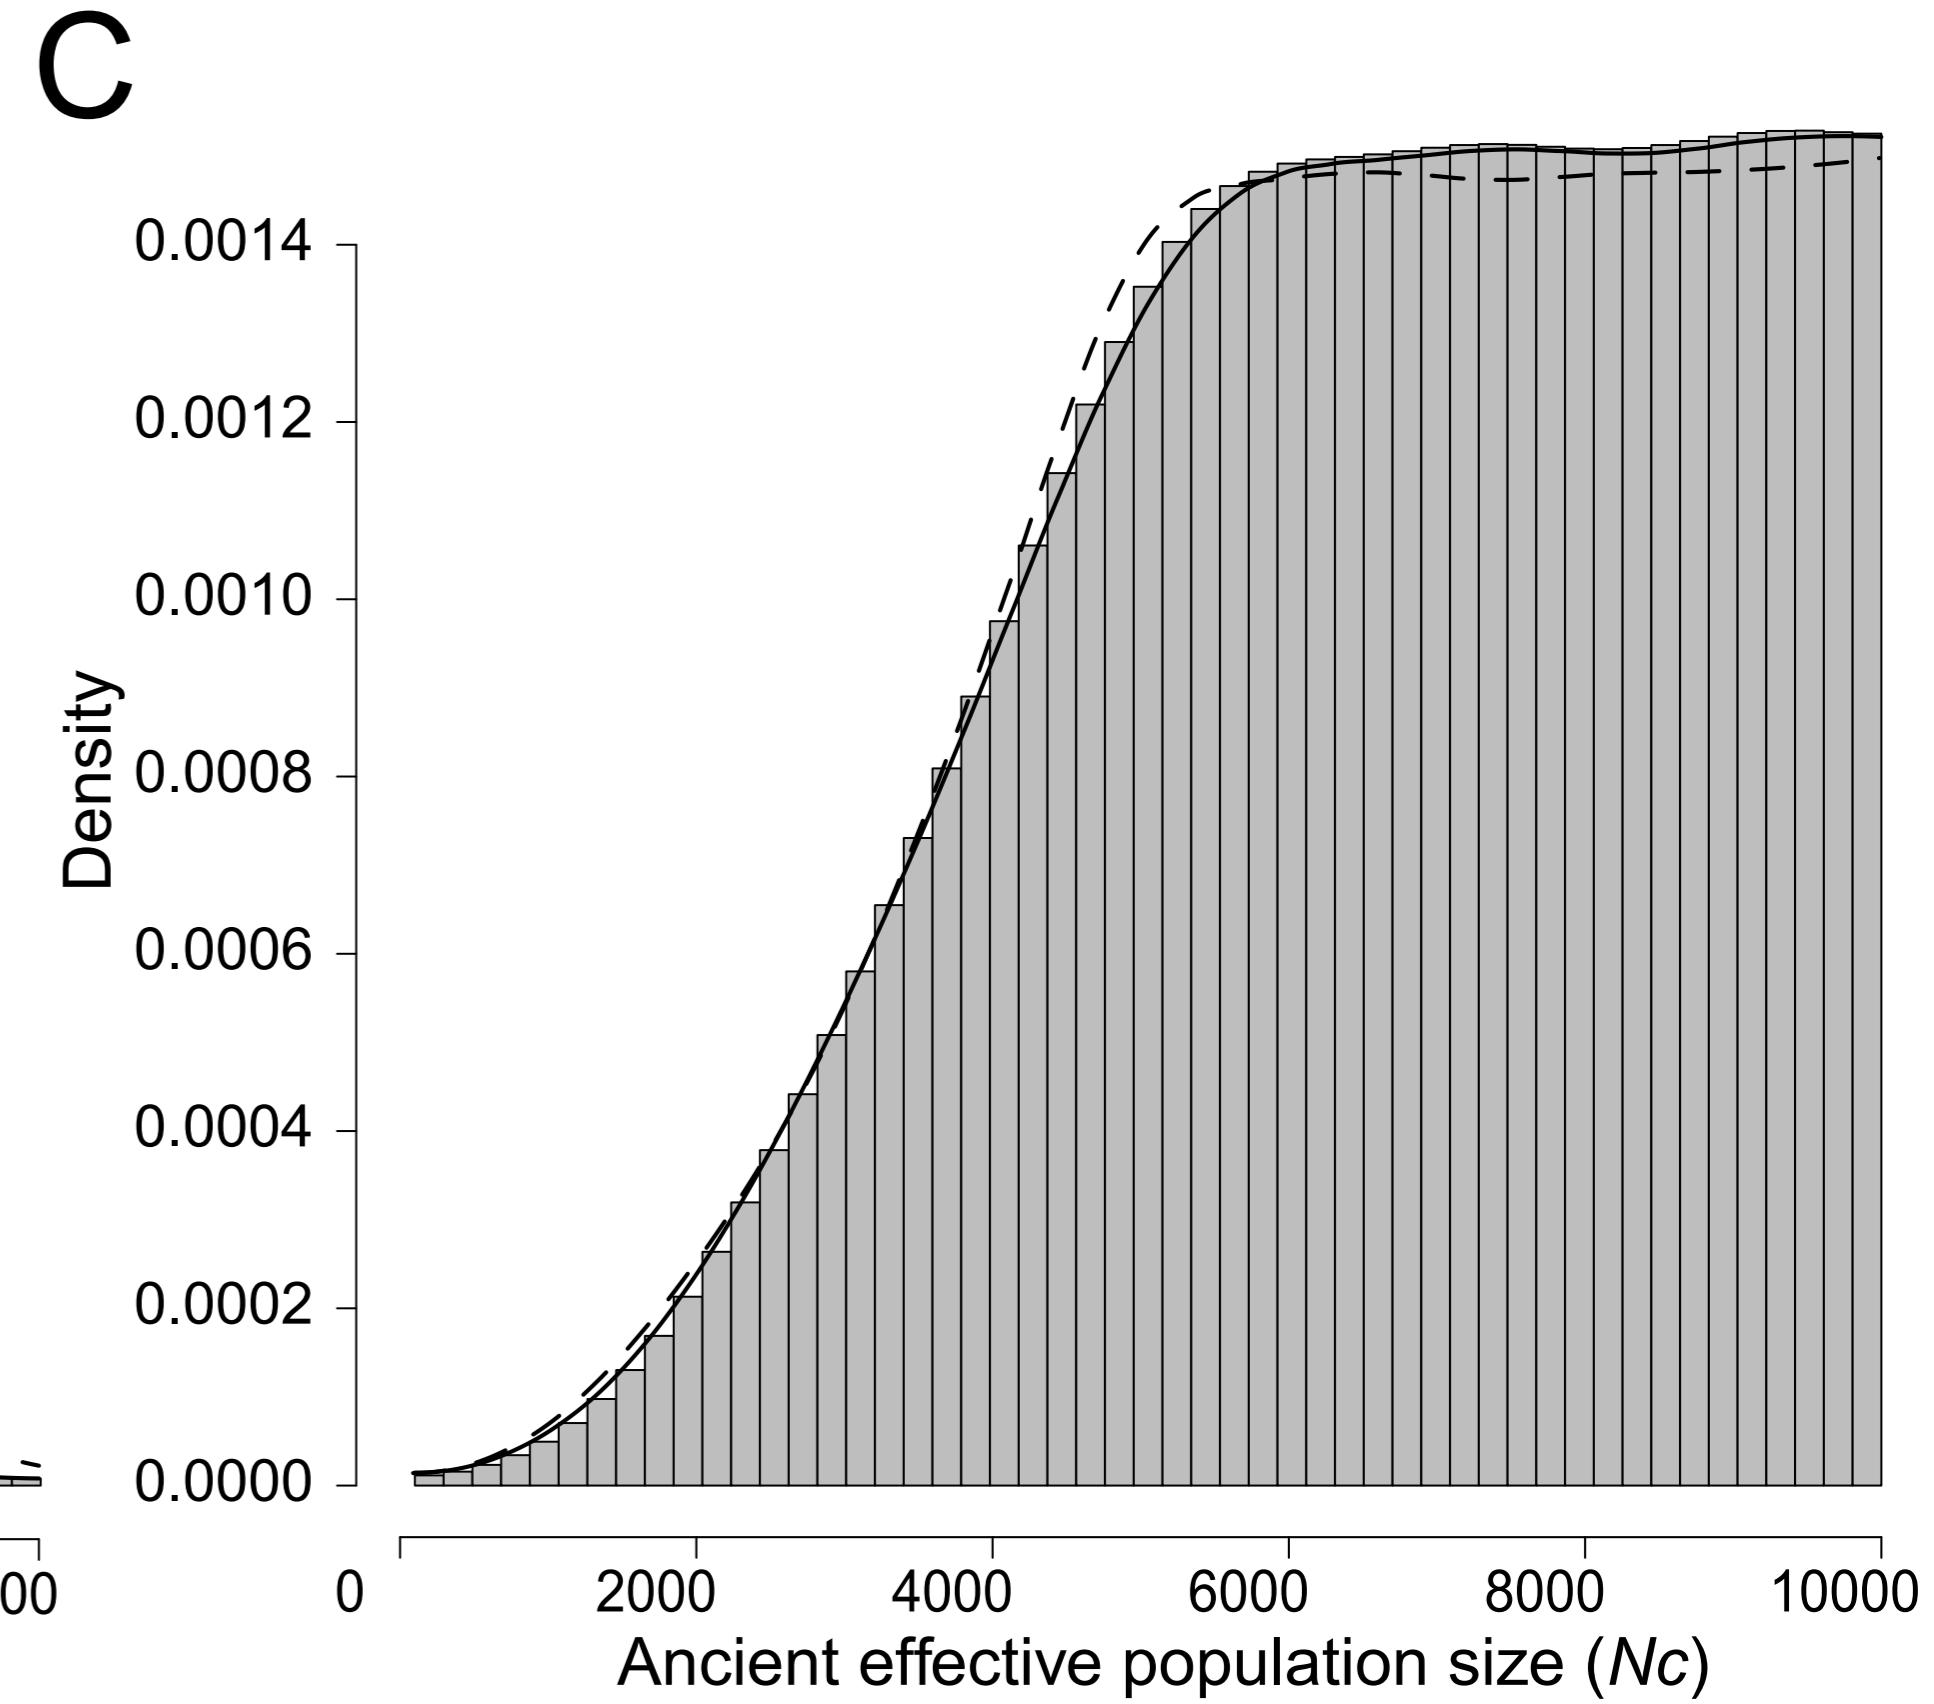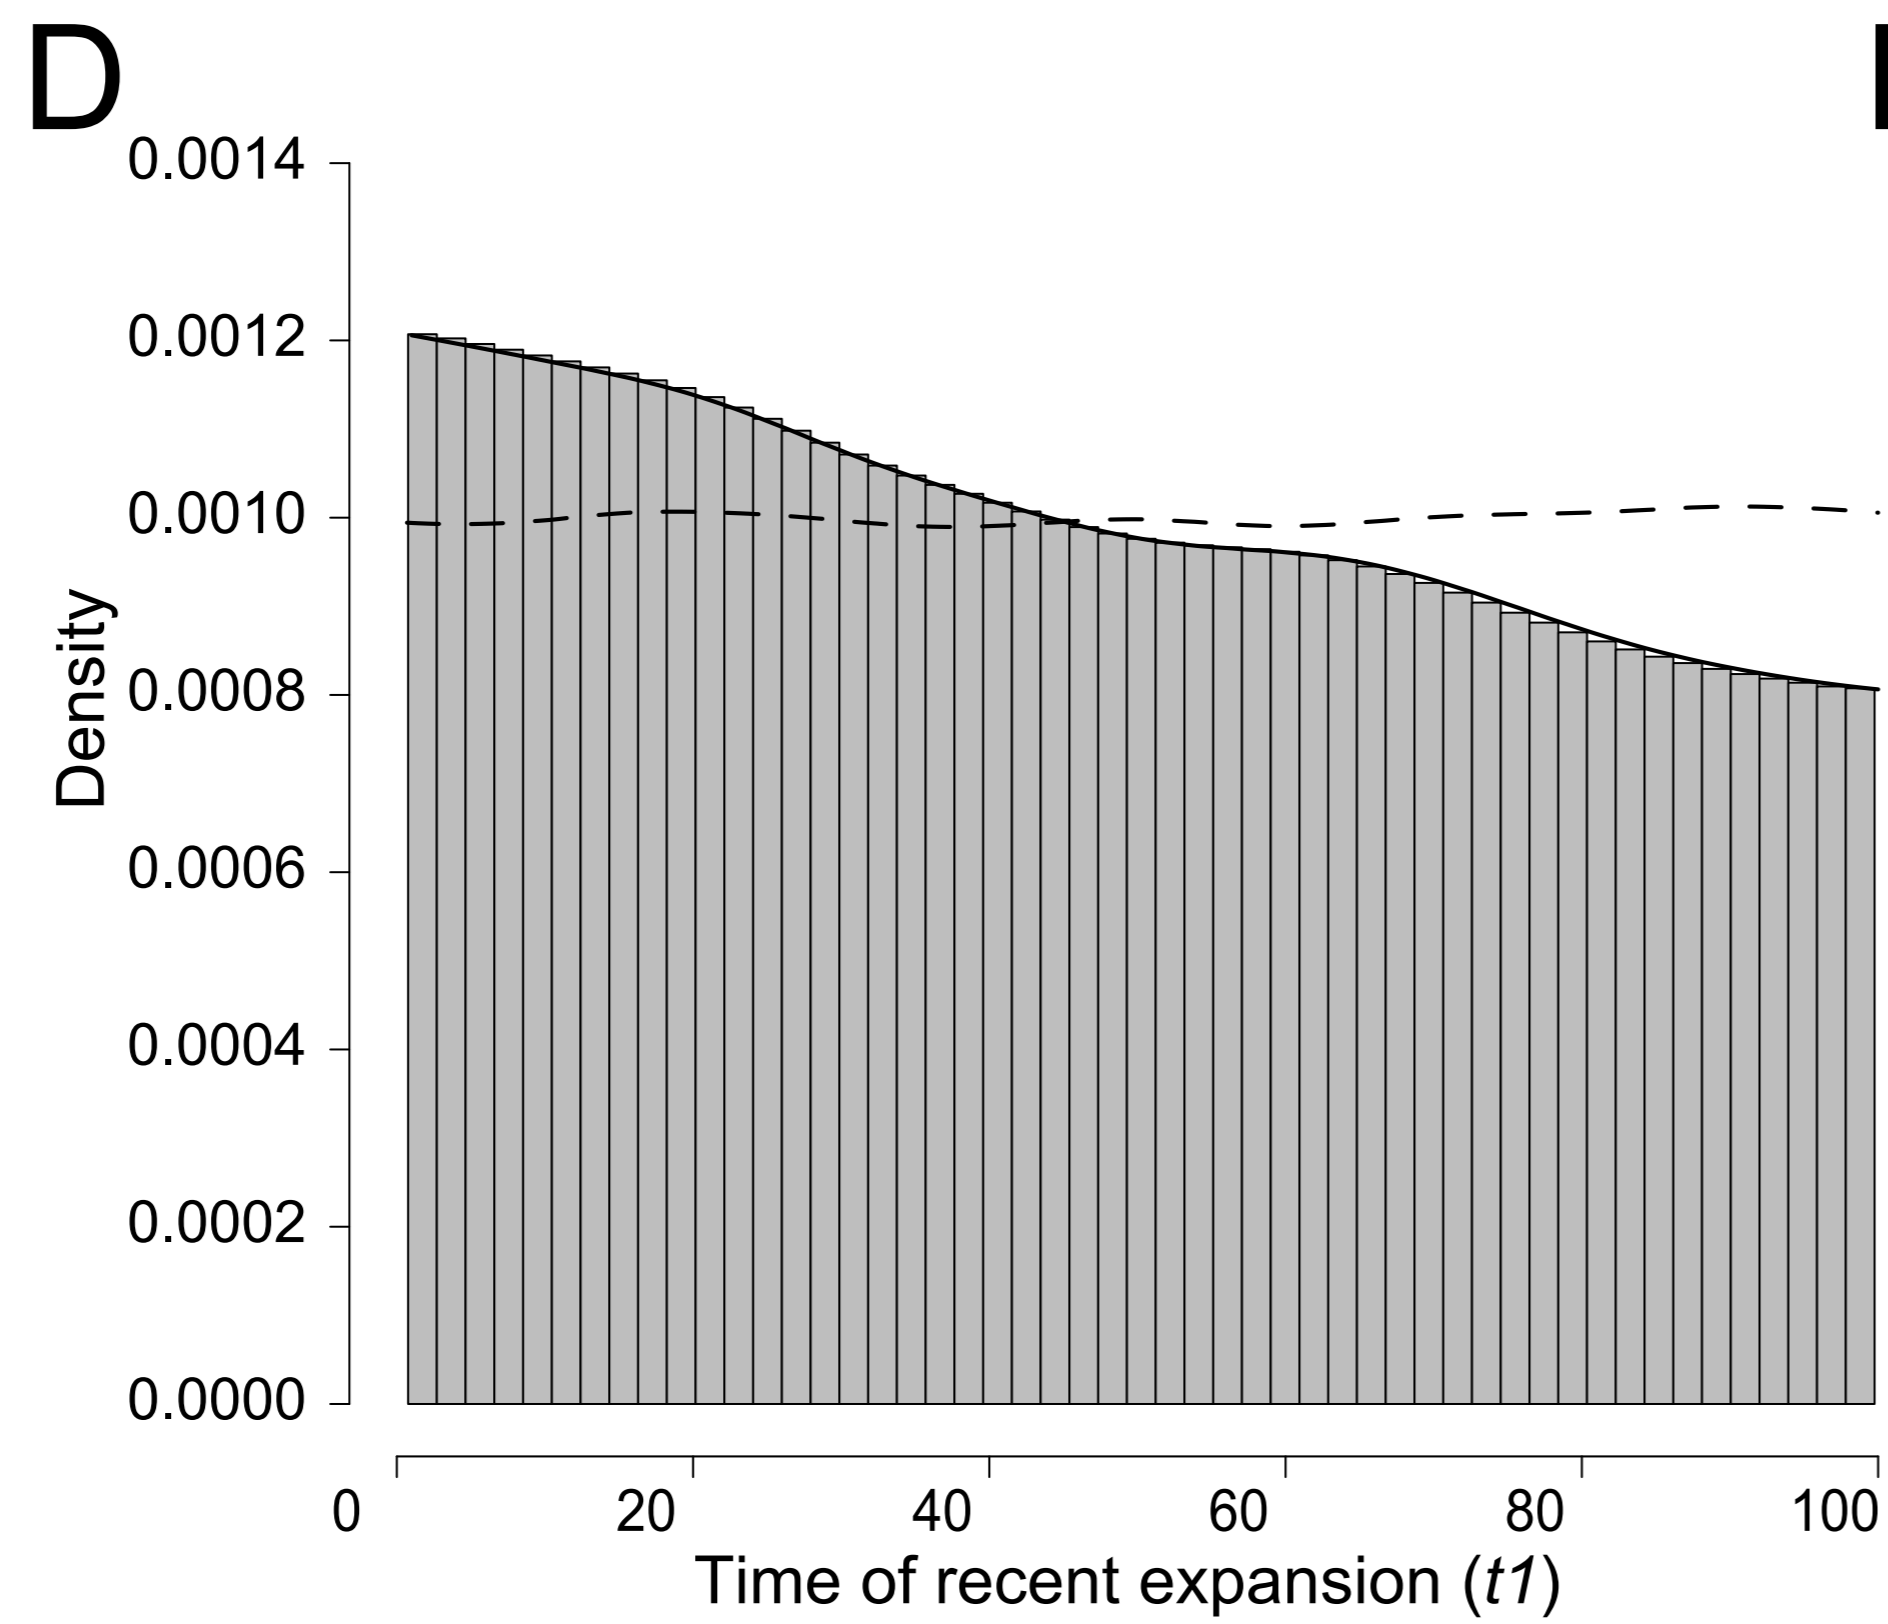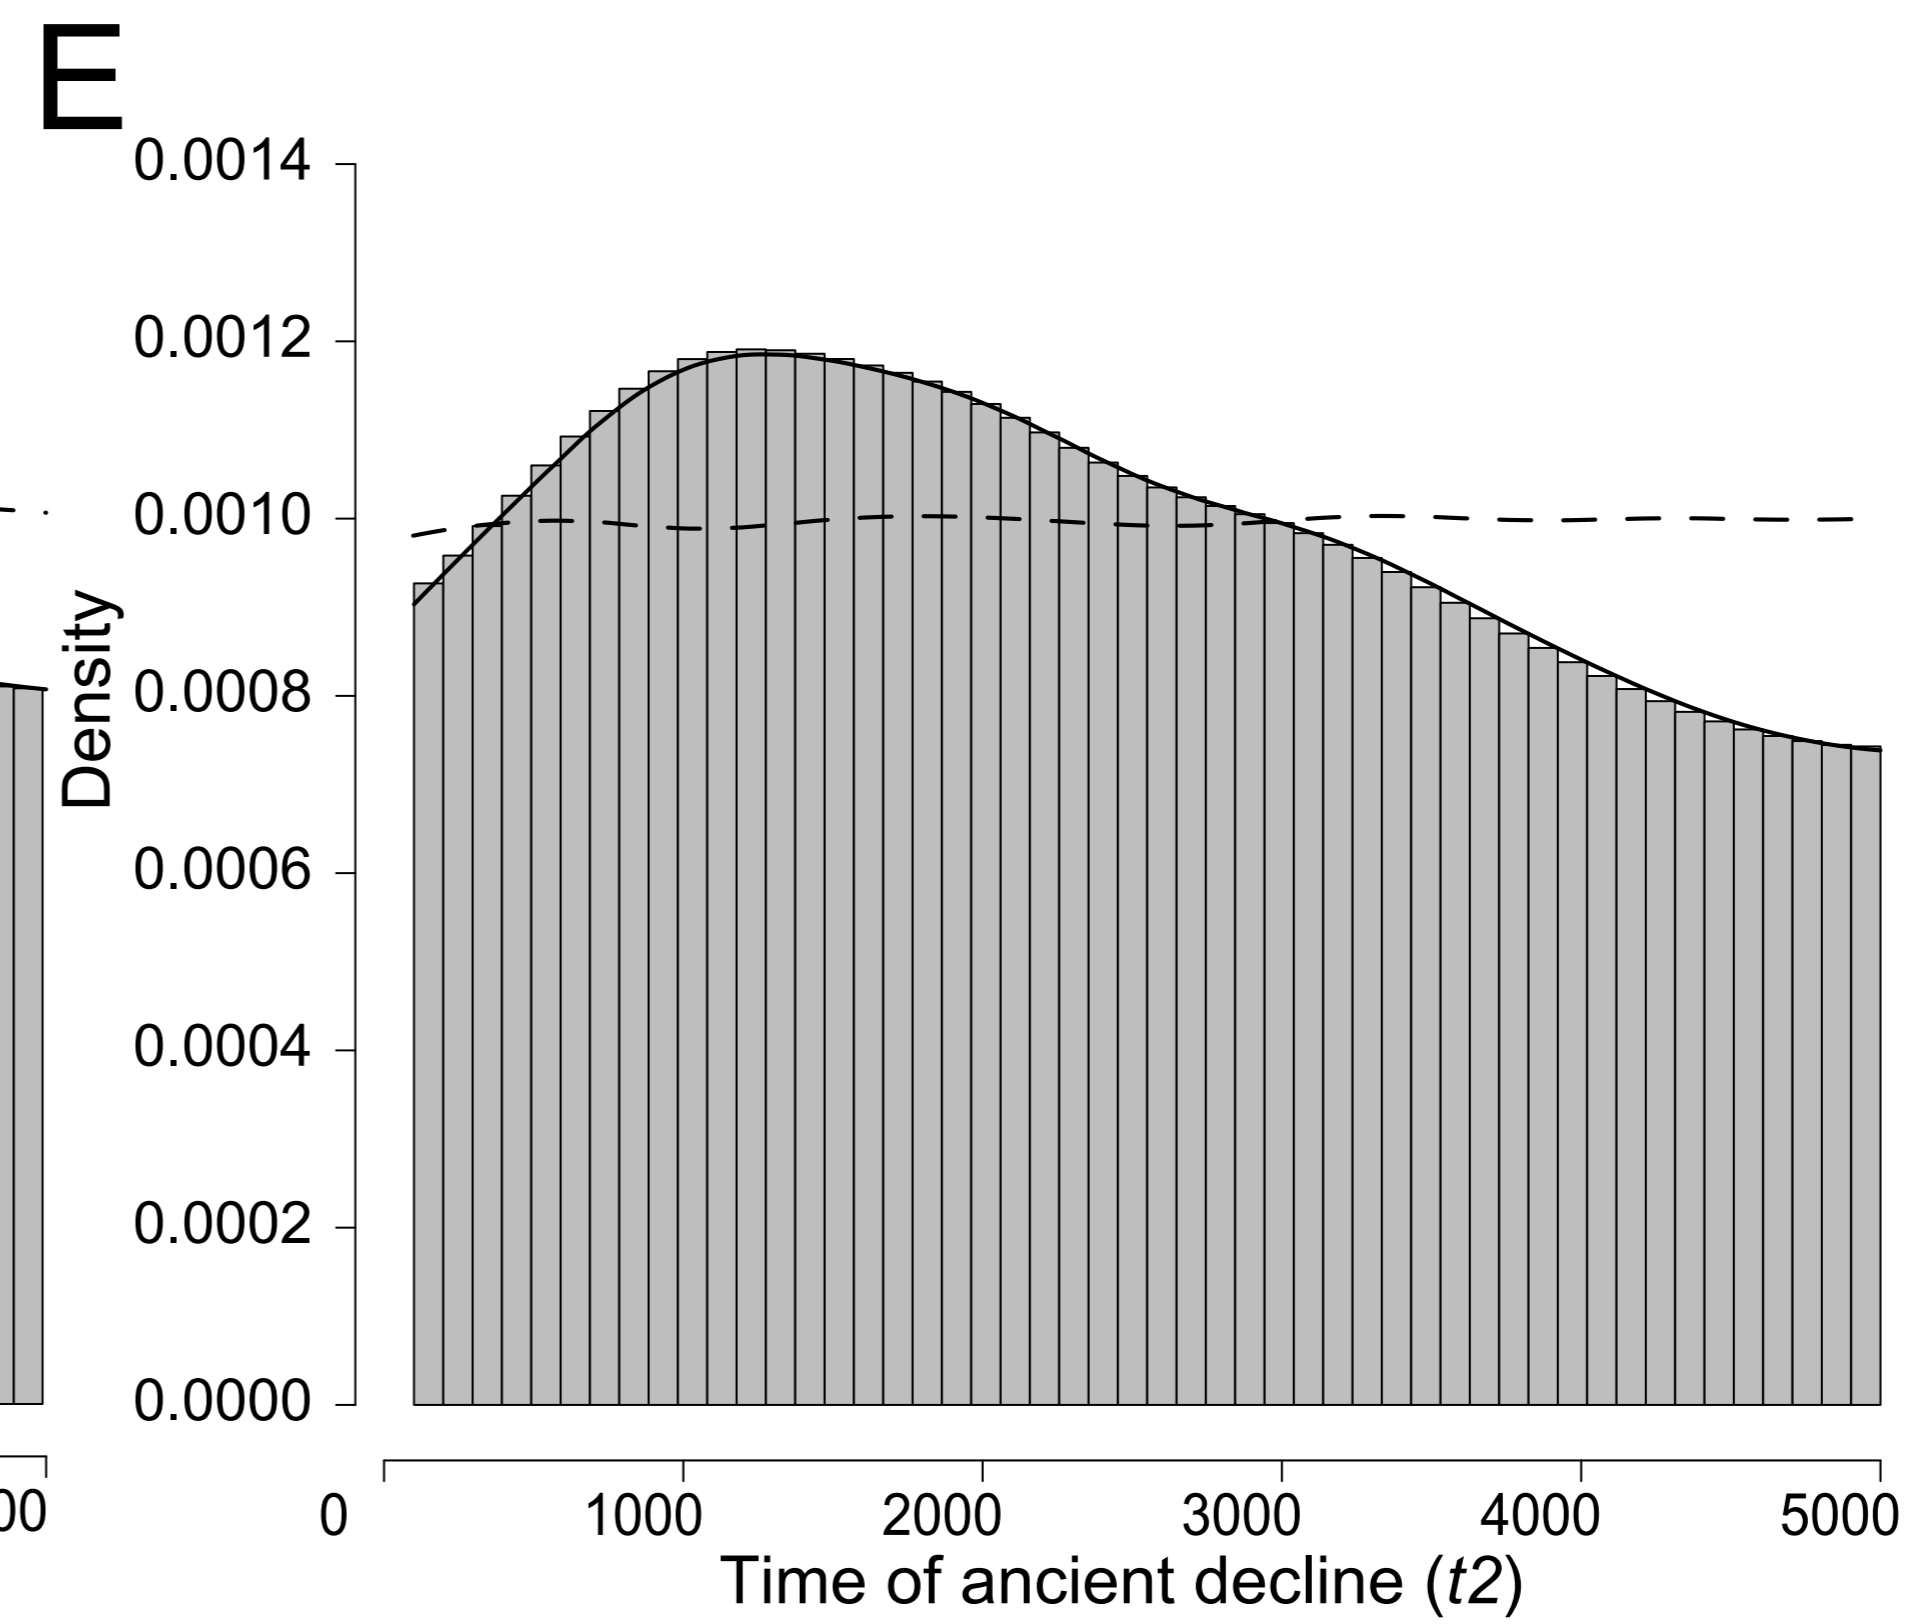

Supplement: hdy201758x7.pdf [file hdy201758x7.pdf]
